# Supplementary material for: SimpactCyan 1.0: An Open-source Simulator for Individual-Based Models in HIV Epidemiology with R and Python Interfaces
Source: PubMed Central journal article supplement (PMC6917719; doi:10.1038/s41598-019-55689-4), 2019-12-17
Supplement: 41598_2019_55689_MOESM1_ESM.pdf [file 41598_2019_55689_MOESM1_ESM.pdf]

# SimpactCyan 1.0: An Open-source Simulator for Individual-Based Models in HIV Epidemiology with R and Python Interfaces

Jori Liesenborgs, Diana M Hendrickx, Elise Kuylen, David Niyukuri, Niel Hens, Wim Delva

**Table S1. Model calibration results: model and target features.**

|                                                      | Model 1 | Model 2 | Model 3 | Target feature | Source              |
|------------------------------------------------------|---------|---------|---------|----------------|---------------------|
| <b>Demography</b>                                    |         |         |         |                | World Bank, 2018    |
| Average annual population growth rate in 2000 - 2016 | -0.20%  | 1.10%   | 2.20%   | 1.50%          |                     |
| <b>HIV prevalence</b>                                |         |         |         |                | Bicego et al. 2013  |
| 18-19 year-old women                                 | 18.30%  | 17.00%  | 23.10%  | 14.30%         |                     |
| 18-19 year-old men                                   | 1.40%   | 1.20%   | 3.40%   | 0.80%          |                     |
| 20-24 year-old women                                 | 29.20%  | 30.10%  | 32.80%  | 31.50%         |                     |
| 20-24 year-old men                                   | 7.50%   | 7.90%   | 10.30%  | 6.60%          |                     |
| 25-29 year-old women                                 | 47.00%  | 44.80%  | 41.90%  | 46.70%         |                     |
| 25-29 year-old men                                   | 21.40%  | 21.70%  | 23.80%  | 21.30%         |                     |
| 30-34 year-old women                                 | 52.70%  | 55.50%  | 44.60%  | 53.80%         |                     |
| 30-34 year-old men                                   | 35.50%  | 36.90%  | 38.30%  | 36.60%         |                     |
| 35-39 year-old women                                 | 50.80%  | 50.80%  | 41.80%  | 49.10%         |                     |
| 35-39 year-old men                                   | 38.50%  | 42.40%  | 42.50%  | 47.00%         |                     |
| 40-44 year-old women                                 | 45.00%  | 46.70%  | 42.40%  | 39.70%         |                     |
| 40-44 year-old men                                   | 37.90%  | 41.80%  | 41.70%  | 45.50%         |                     |
| 45-49 year-old women                                 | 39.70%  | 43.00%  | 33.40%  | 31.60%         |                     |
| 45-49 year-old men                                   | 33.60%  | 36.40%  | 32.40%  | 42.50%         |                     |
| <b>HIV incidence (per 100 person-years)</b>          |         |         |         |                | Justman et al. 2017 |
| 18-19 year-old women                                 | 6.3     | 5.2     | 6       | 3.8            |                     |
| 18-19 year-old men                                   | 0.8     | 1       | 1.9     | 0.8            |                     |
| 20-24 year-old women                                 | 5.2     | 5       | 4.7     | 4.3            |                     |
| 20-24 year-old men                                   | 2.6     | 2.8     | 2.9     | 1.6            |                     |
| 25-29 year-old women                                 | 2.4     | 3.2     | 2.8     | 2              |                     |
| 25-29 year-old men                                   | 4.7     | 4.3     | 4.8     | 2.6            |                     |
| 30-34 year-old women                                 | 1.5     | 5.6     | 2.2     | 2.7            |                     |
| 30-34 year-old men                                   | 2.9     | 4.7     | 5.4     | 3.1            |                     |
| 35-39 year-old women                                 | 1.3     | 0.7     | 0.9     | 4              |                     |
| 35-39 year-old men                                   | 2.5     | 3.4     | 2.5     | 0.4            |                     |
| 40-44 year-old women                                 | 0.8     | 0.2     | 0.6     | 2.1            |                     |
| 40-44 year-old men                                   | 1.4     | 1.7     | 2.8     | 1.2            |                     |
| 45-49 year-old women                                 | 0       | 0.7     | 0.3     | 1.2            |                     |
| 45-49 year-old men                                   | 0       | 1.4     | 1.3     | 0              |                     |
| <b>ART coverage in &gt;=15 year-old adults</b>       |         |         |         |                | UNAIDS, 2019        |
| 2010                                                 | 39.90%  | 34.20%  | 25.00%  | 37%            |                     |

|                                                                                                         |        |        |        |        |              |
|---------------------------------------------------------------------------------------------------------|--------|--------|--------|--------|--------------|
| 2011                                                                                                    | 46.10% | 40.30% | 32.00% | 40%    |              |
| 2012                                                                                                    | 49.40% | 43.60% | 36.60% | 44%    |              |
| 2013                                                                                                    | 51.30% | 46.00% | 40.20% | 49%    |              |
| 2014                                                                                                    | 64.30% | 62.20% | 58.50% | 58%    |              |
| 2015                                                                                                    | 64.80% | 64.30% | 62.10% | 67%    |              |
| 2016                                                                                                    | 65.10% | 66.20% | 64.20% | 76%    |              |
| 2017                                                                                                    | 78.90% | 83.10% | 84.20% | 85%    |              |
| <b><i>Virology</i></b>                                                                                  |        |        |        |        | UNAIDS, 2019 |
| fraction of >=15 year-old adults who were virally suppressed (less than 1000 viral copies per mL blood) | 82.50% | 85.80% | 86.80% | 74%    |              |
| <b><i>HIV prevalence in 15-49 year-old adults</i></b>                                                   |        |        |        |        | UNAIDS, 2019 |
| 1990                                                                                                    | 2.20%  | 1.70%  | 1.90%  | 1.70%  |              |
| 1991                                                                                                    | 3.90%  | 2.40%  | 3.10%  | 3.30%  |              |
| 1992                                                                                                    | 6.10%  | 3.80%  | 5.00%  | 5.70%  |              |
| 1993                                                                                                    | 8.60%  | 5.60%  | 7.90%  | 8.80%  |              |
| 1994                                                                                                    | 11.80% | 7.90%  | 11.50% | 12.40% |              |
| 1995                                                                                                    | 15.40% | 11.10% | 15.40% | 16.10% |              |
| 1996                                                                                                    | 18.90% | 13.90% | 18.60% | 19.40% |              |
| 1997                                                                                                    | 21.90% | 16.40% | 20.60% | 22.00% |              |
| 1998                                                                                                    | 24.50% | 18.90% | 22.00% | 23.90% |              |
| 1999                                                                                                    | 26.20% | 20.80% | 22.60% | 25.10% |              |
| 2000                                                                                                    | 27.10% | 22.00% | 22.90% | 25.80% |              |
| 2001                                                                                                    | 27.60% | 22.80% | 23.00% | 26.10% |              |
| 2002                                                                                                    | 28.10% | 23.50% | 22.90% | 26.10% |              |
| 2003                                                                                                    | 28.10% | 24.20% | 22.50% | 25.90% |              |
| 2004                                                                                                    | 27.90% | 24.50% | 22.40% | 25.70% |              |
| 2005                                                                                                    | 27.70% | 24.80% | 22.30% | 25.50% |              |
| 2006                                                                                                    | 27.40% | 24.80% | 22.20% | 25.60% |              |
| 2007                                                                                                    | 27.30% | 24.80% | 22.60% | 25.90% |              |
| 2008                                                                                                    | 26.80% | 25.00% | 22.80% | 26.30% |              |
| 2009                                                                                                    | 26.90% | 25.30% | 23.20% | 26.80% |              |
| 2010                                                                                                    | 26.70% | 25.40% | 23.70% | 27.40% |              |
| 2011                                                                                                    | 26.30% | 25.40% | 24.20% | 27.80% |              |
| 2012                                                                                                    | 26.10% | 25.40% | 24.60% | 28.20% |              |
| 2013                                                                                                    | 26.20% | 25.50% | 25.00% | 28.40% |              |
| 2014                                                                                                    | 25.90% | 25.50% | 25.00% | 28.40% |              |
| 2015                                                                                                    | 25.70% | 25.20% | 25.00% | 28.30% |              |
| 2016                                                                                                    | 25.50% | 25.00% | 24.90% | 27.90% |              |
| 2017                                                                                                    | 25.10% | 24.40% | 24.50% | 27.40% |              |

| <b>Table S2. Evolutionary models fitted to empirical and synthetic data.</b> |                       |                       |
|------------------------------------------------------------------------------|-----------------------|-----------------------|
|                                                                              | <b>Empirical data</b> | <b>Synthetic data</b> |
| <b>Relative Frequencies</b>                                                  |                       |                       |
| adenine (A)                                                                  | 0.3906                | 0.3929                |
| cytosine (C)                                                                 | 0.1752                | 0.1726                |
| guanine (G)                                                                  | 0.2201                | 0.2234                |
| thymine (T)                                                                  | 0.2142                | 0.2111                |
| <b>Rate heterogeneity</b>                                                    |                       |                       |
| shape parameter                                                              | 0.6250                | 0.6244                |
| <b>Relative substitution rates</b>                                           |                       |                       |
| $r(A \rightarrow G) = r(G \rightarrow A)$                                    | 1.9803                | 2.0421                |
| $r(A \rightarrow C) = r(C \rightarrow A)$                                    | 9.4404                | 9.5318                |
| $r(A \rightarrow T) = r(T \rightarrow A)$                                    | 0.9423                | 0.9674                |
| $r(G \rightarrow C) = r(C \rightarrow G)$                                    | 0.8770                | 0.8840                |
| $r(G \rightarrow T) = r(T \rightarrow G)$                                    | 11.6367               | 12.0604               |
| $r(C \rightarrow T) = r(T \rightarrow C)$                                    | 1.0000                | 1.0000                |
| <b>Fraction of invariant sites</b>                                           |                       |                       |
| I parameter                                                                  | 0.2130                | 0.3091                |

**Table S3. Normalised topological properties of the phylogenetic trees reconstructed from empirical and synthetic data with matching sampling dates (See also Figure S1).**

|                                            | <b>Empirical data</b> | <b>Synthetic data</b> |
|--------------------------------------------|-----------------------|-----------------------|
| Sackin index of tree imbalance             | 0.1020                | 0.0880                |
| Colless index of tree imbalance            | 0.0760                | 0.0590                |
| Average size of ladders <sup>1</sup>       | 0.0060                | 0.0070                |
| Cherries <sup>2</sup>                      | 0.6630                | 0.6350                |
| IL number <sup>3</sup>                     | 0.3390                | 0.3660                |
| Maximum height of the tips                 | 0.0830                | 0.0730                |
| Pitchforks <sup>4</sup>                    | 0.4510                | 0.4770                |
| First staircase-ness measure <sup>5</sup>  | 0.6000                | 0.6320                |
| Second staircase-ness measure <sup>6</sup> | 0.6030                | 0.5980                |

1 A ladder is defined as a series of consecutive nodes in the tree, each of which has exactly one tip child. The size of the ladder is given by the number of nodes in the chain.

2 A cherry is a pair of sister tips.

3 The IL number is defined as the number of internal nodes with a single tip child.

4 Pitchforks are clades with three tips.

5 The proportion of subtrees that are imbalanced (i.e. subtrees where the left child has more tip descendants than the right child, or vice versa).

6 The average of all the  $\min(l,r)/\max(l,r)$  values of each subtree, where  $l$  and  $r$  are the number of tips in the left and right children of a subtree.

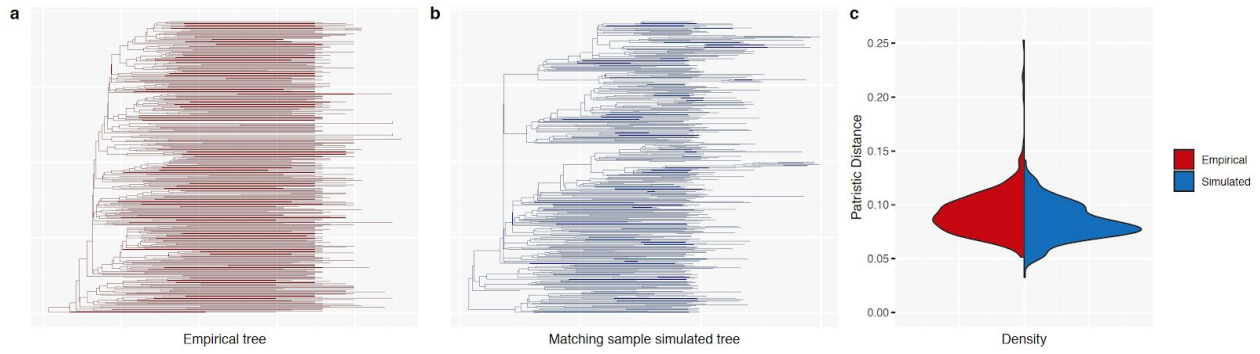

**Figure S1.** (a) Time-resolved phylogenetic tree, reconstructed from the empirical HIV sequence data. (b) Time-resolved phylogenetic tree, reconstructed from a subset of the synthetic HIV sequence data, with sampling dates that match those of the empirical dataset. (c) The density distribution of patristic distances of the respective phylogenetic trees.
